# Supplementary material for: NT5C2 methylation regulatory interplay between DNMT1 and insulin receptor in type 2 diabetes
Source: PubMed Central journal article supplement (PMC7527562; doi:10.1038/s41598-020-71336-9), 2020-09-30
Supplement: 41598_2020_71336_MOESM3_ESM.pdf [file 41598_2020_71336_MOESM3_ESM.pdf]

## ***NT5C2* methylation regulatory interplay between DNMT1 and insulin receptor in type 2 diabetes**

Yng-Tay Chen<sup>1,\*</sup>, Wei-De Lin<sup>2,3</sup>, Wen-Ling Liao<sup>4,5</sup>, Ya-Ching Tsai<sup>2</sup>, Jiunn-Wang Liao<sup>6</sup>,  
Fuu-Jen Tsai<sup>2,7,8,\*</sup>

<sup>1</sup>Graduate Institute of Food Safety, College of Agriculture and Natural Resources, National Chung Hsing University, Taichung, Taiwan.

<sup>2</sup>Human Genetic Center, Department of Medical Research, China Medical University Hospital, China Medical University, Taichung, Taiwan.

<sup>3</sup>School of Post Baccalaureate Chinese Medicine, China Medical University, Taichung, Taiwan.

<sup>4</sup>Graduate Institute of Integrated Medicine, China Medical University, Taichung, Taiwan.

<sup>5</sup>Center for Personalized Medicine, China Medical University Hospital, Taichung, Taiwan.  
Graduate

<sup>6</sup>Institute of Veterinary Pathobiology, National Chung Hsing University, Taichung, Taiwan.

<sup>7</sup>School of Chinese Medicine, China Medical University, Taichung, Taiwan.

<sup>8</sup>Department of Health and Nutrition Biotechnology, Asia University, Taichung, Taiwan.

\*email: ytchen101@dragon.nchu.edu.tw; d0704@mail.cmuh.org.tw

**Figure S1**

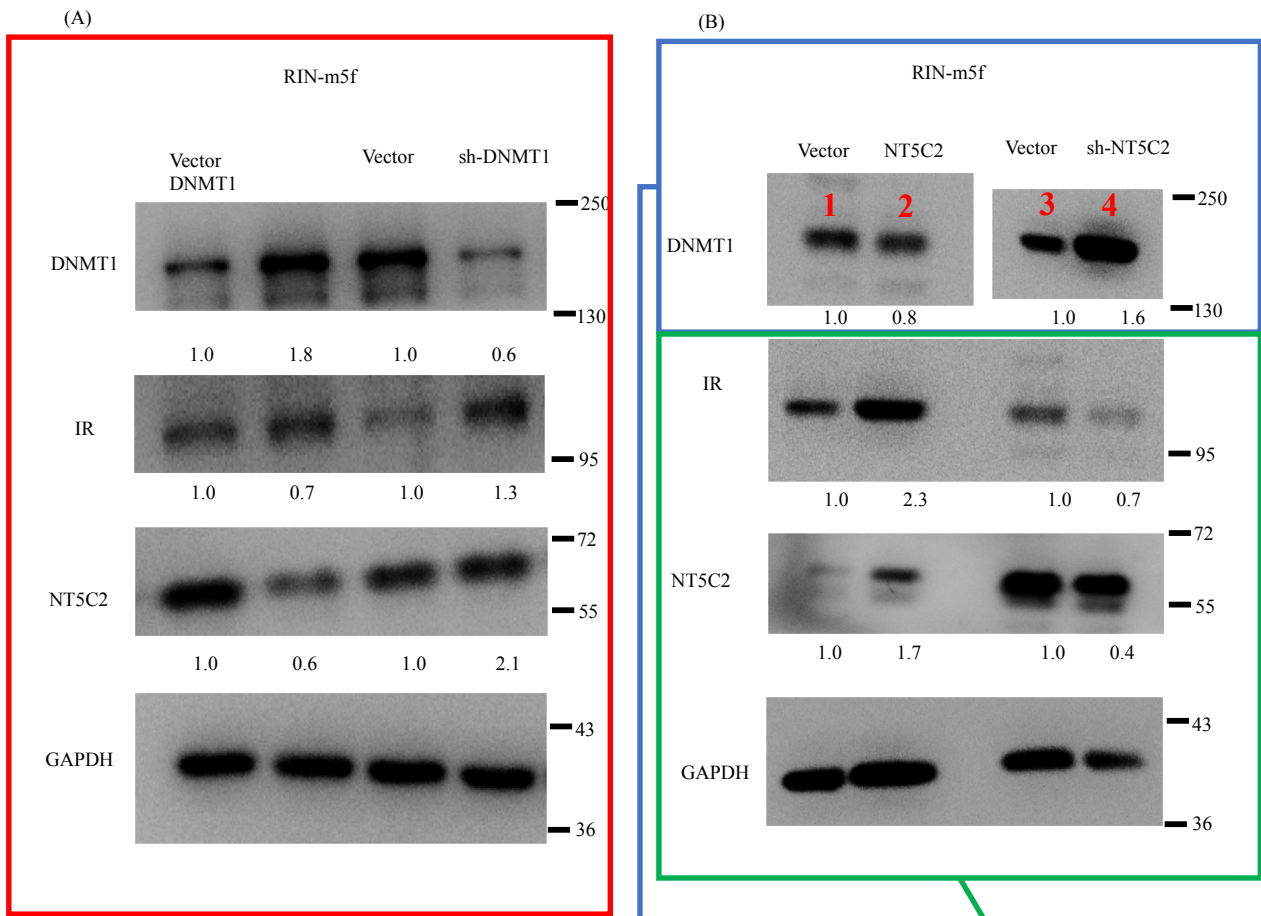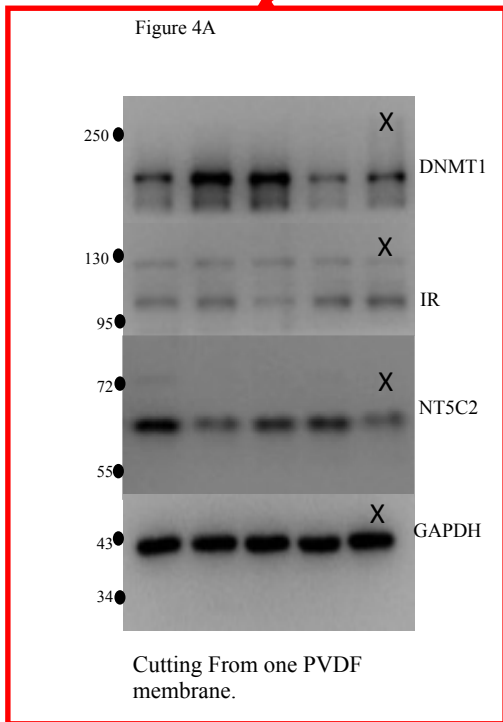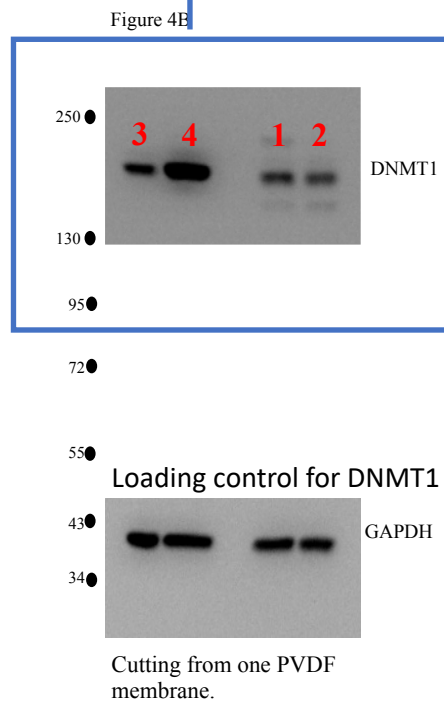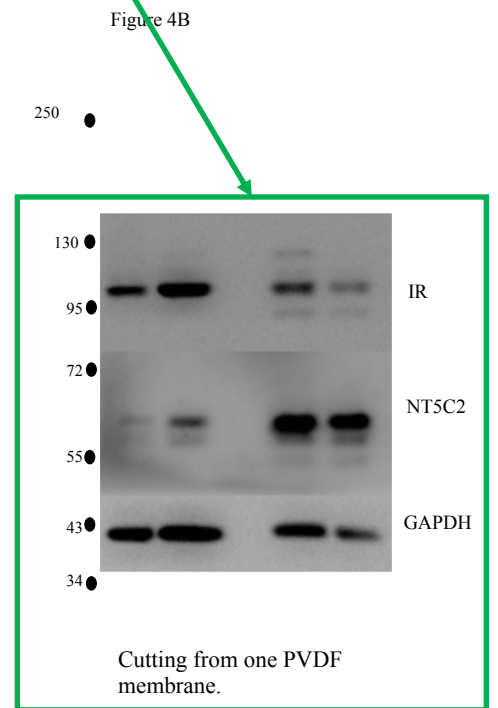

**Figure S2**

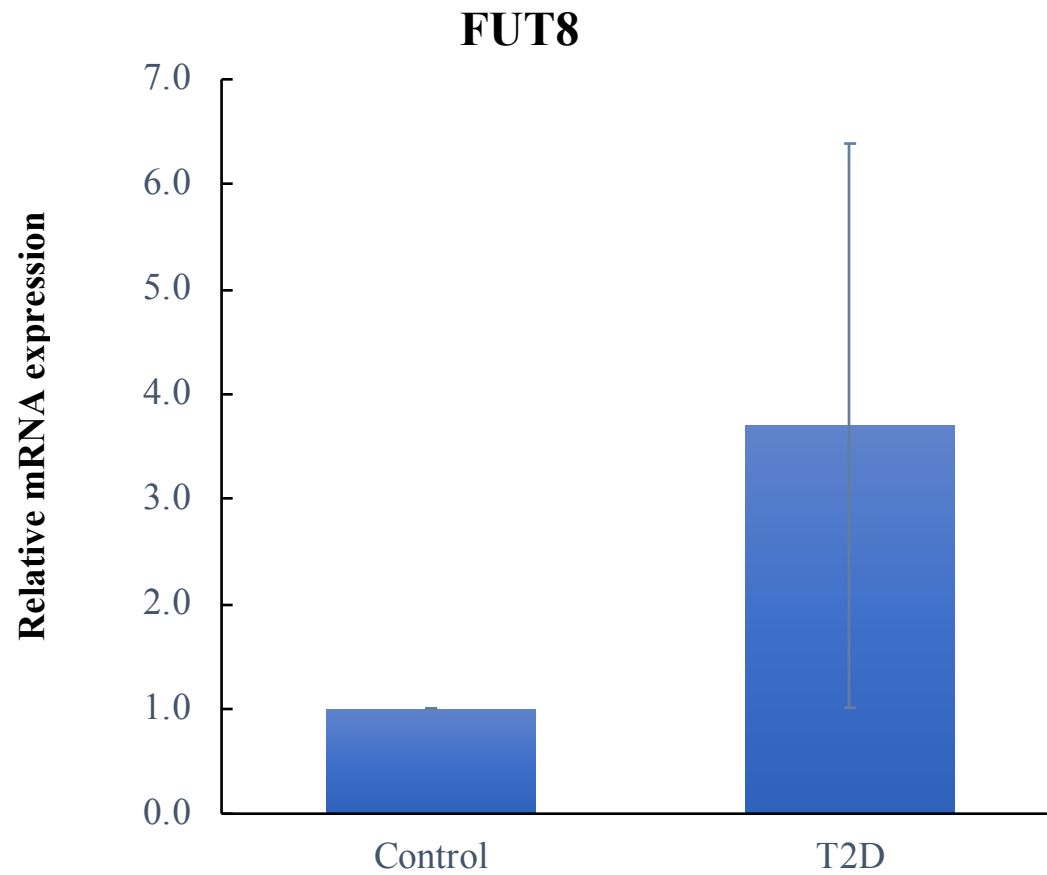

## **Supplementary Figure:**

**Figure S1. Original western blot panels with gel markers for Figure 4.** The samples drive from the same experiment and the blots were processed in parallel. We were cutting the PVDF membrane according to molecular weight and reacted with DNMT1, NT5C2, IR, and GAPDH antibodies separately. The staining of GAPDH was used as a loading control.

**Figure S2. FUT8 mRNA was non-significant difference between healthy control and patients with T2D.** FUT8 mRNA expression is non-significant difference between patients with T2D (N=94) than in control (N=98). The relative mRNA levels in patients is  $3.70 \pm 2.69$  versus healthy control ( $P > 0.05$ , SPSS software 15.0 for windows).

## **Supplementary Table:**

**Table S1. 698 genes with promoter and exon regions SNPs associated with T2D patients.**

**Table S2. 260 genes with promoter hypermethylated and gene silencing in KK-Ay mice.** Gene expression array results were analyzed by using Affymetrix Expression Console software version 4.0. Genes and exons expression differences were identified by Transcriptome Analysis Console 2.0.0.9 software.

**Table S3. The SNPs near NT5C2 gene which is associated with BMI in Asian and European population.**

**Table S4. The DNA promoter hypermethylated genes in T2D patients versus healthy control.**

**Table S3.** The SNPs near NT5C2 gene which is associated with BMI in Asian and European population.

| PUBMEDID | CHR_POS   | STRONGEST SNP-RISK ALLELE | SNPS       | RISK ALLELE FREQUENCY | P-VALUE  | OR or BETA  | 95% CI (TEXT)                | Population | MAPPED_TRAIT                      | STUDY ACCESSION |
|----------|-----------|---------------------------|------------|-----------------------|----------|-------------|------------------------------|------------|-----------------------------------|-----------------|
| 25673413 | 103109281 | rs11191560-C              | rs11191560 | 0.089                 | 8.00E-09 | 0.031       | [0.02-0.041] kg/m2 increase  | European   | body mass index                   | GCST002783      |
| 28443625 | 103109281 | rs11191560-T              | rs11191560 | 0.9015                | 7.00E-06 | 0.0371      | [0.021-0.053] kg/m2 decrease | European   | body mass index                   | GCST004499      |
| 28443625 | 103109281 | rs11191560-T              | rs11191560 | 0.9015                | 4.00E-06 | 0.0288      | [0.017-0.041] kg/m2 decrease | European   | body mass index                   | GCST004499      |
| 28443625 | 103109281 | rs11191560-T              | rs11191560 | 0.9015                | 5.00E-06 | 0.0337      | [0.019-0.048] kg/m2 decrease | European   | smoking behavior, body mass index | GCST004495      |
| 28443625 | 103109281 | rs11191560-T              | rs11191560 | 0.9015                | 5.00E-07 | 0.028       | [0.017-0.039] kg/m2 decrease | European   | smoking behavior, body mass index | GCST004495      |
| 28443625 | 103109281 | rs11191560-T              | rs11191560 | 0.9015                | 1.00E-07 |             |                              | European   | smoking behavior, body mass index | GCST004497      |
| 28443625 | 103109281 | rs11191560-T              | rs11191560 | 0.9015                | 2.00E-06 |             |                              | European   | smoking behavior, body mass index | GCST004497      |
| 24861553 | 103146454 | rs11191580-C              | rs11191580 | 0.27                  | 4.00E-08 | 0.0295      | [0.019-0.04] unit increase   | East Asian | body mass index                   | GCST002461      |
| 25673413 | 103109281 | rs11191560-C              | rs11191560 | 0.091                 | 2.00E-09 | 0.031       | [0.021-0.041] kg/m2 increase | European   | body mass index                   | GCST002783      |
| 26426971 | 103146454 | rs11191580-T              | rs11191580 | 0.9097                | 2.00E-11 | 0.031222157 | unit decrease                | European   | body mass index                   | GCST005951      |
| 30108127 | 103109281 | rs11191560-T              | rs11191560 | NR                    | 8.00E-15 | 0.033       | [NR] unit decrease           | European   | body mass index                   | GCST006368      |
